# Supplementary material for: Global and regional estimates of genital human papillomavirus prevalence among men: a systematic review and meta-analysis
Source: PubMed Central journal article supplement — Lancet Glob Health. 2023 Aug 15;11(9):e1345–62. doi: 10.1016/S2214-109X(23)00305-4 (PMC10447222; doi:10.1016/s2214-109x(23)00305-4), 2023-08-15

# THE LANCET

## Global Health

### Supplementary appendix 3

This appendix formed part of the original submission and has been peer reviewed. We post it as supplied by the authors.

Supplement to: Bruni L, Albero G, Rowley J, et al. Global and regional estimates of genital human papillomavirus prevalence among men: a systematic review and meta-analysis. *Lancet Glob Health* 2023; **11**: e1345–62.

# SUPPLEMENTARY MATERIAL

HPV in men

|                                                                                                                                                                                                                                          |    |
|------------------------------------------------------------------------------------------------------------------------------------------------------------------------------------------------------------------------------------------|----|
| Supplementary introduction.                                                                                                                                                                                                              | 2  |
| Appendix Table A1. Data Sources and Search Criteria.                                                                                                                                                                                     | 2  |
| Supplementary methods                                                                                                                                                                                                                    | 3  |
| Appendix Table A2. Overview of study methods.                                                                                                                                                                                            | 3  |
| Appendix Table A3. Quality assessment checklist for prevalence studies (adapted from Hoy et al, and Agbor et al).                                                                                                                        | 5  |
| Appendix Table A4. Countries, number of studies and men included per sub-analysis                                                                                                                                                        | 6  |
| Appendix Table A5. Meta-analyses of studies reporting prevalence of 2-valent, 4-valent and 9-valent HPV vaccines by United Nations Sustainable Development Goals regional or sub-regional grouping and World Bank income classification. | 7  |
| Appendix Table A6. Meta-analyses of studies, median and interquartile range (Q3-Q1) of HR-HPV prevalence by United Nations Sustainable Development Goals regional or sub-regional grouping.                                              | 8  |
| Appendix Table A7. Prevalence of genital HPV infection in men: any HPV, HR-HPV, HPV-16 and HPV-6 by selected variables.                                                                                                                  | 9  |
| Appendix Figure A1. Meta-analysis of male genital HR-HPV prevalence by United Nations Sustainable Development Goals regional or sub-regional grouping.                                                                                   | 11 |
| Appendix Figure A2. Meta-analysis of male genital HPV prevalence (any HPV) by United Nations Sustainable Development Goals regional or sub-regional grouping.                                                                            | 12 |
| Appendix Figure A3. Meta-analysis of male genital HPV-16 prevalence by United Nations Sustainable Development Goals regional or sub-regional grouping.                                                                                   | 13 |
| Appendix Figure A4. Meta-analysis of male genital HPV-6 prevalence by United Nations Sustainable Development Goals regional or sub-regional grouping.                                                                                    | 14 |
| Appendix Figure A5. Age-specific prevalence of HR-HPV infection in men for the studies with data by age.                                                                                                                                 | 15 |
| Appendix Figure A6. Funnel plot for HR-HPV prevalence by study.                                                                                                                                                                          | 16 |

## Supplementary introduction.

The first global review of genital HPV prevalence in men was published in 2006 and identified 40 publications published between 1990 and 2006 in adult men at any risk of infection who were not immunocompromised<sup>1</sup>. The review included studies that had data on population characteristics and that evaluated male genital anatomic sites or specimens for HPV DNA or included assessments of seropositivity to HPV type 6, 11, 16, or 18 in men. The paper provided a summary of studies but did not make any regional or global estimates.

A second review in 2011 focused on age-specific prevalence of genital HPV-DNA prevalence in men and identified 64 studies published between 1989 and 2009<sup>2</sup>. 38 of these studies were from populations at higher risk of HPV infections, such as human immunodeficiency virus-positive males, male partners of women with HPV infection or abnormal cytology, men who have sex with men, and sexually transmitted infection clinic attendees. There was considerable variation in HPV prevalence - from 1% to 84% among low-risk men and from 2% to 93% among higher risk men. The largest proportions of studies were from Europe (38%) and North America (25%), with smaller proportions from Central and South America (19%), Asia (11%), and Africa (5%).

## Appendix Table A1. Data Sources and Search Criteria.

|                                                                                                                                                                                                                                                                |
|----------------------------------------------------------------------------------------------------------------------------------------------------------------------------------------------------------------------------------------------------------------|
| Embase Classic + Embase + Ovid MEDLINE (last searched 01 June 2022)<br><i>Included Epub ahead of print, in process, in data review and other non-indexed citations</i>                                                                                         |
| ((hpv OR papilloma*) AND (male* OR men OR man) AND (prevalence)).mp.<br>Restricted to papers published post 01/01/1995                                                                                                                                         |
| Global Index Medicus (last searched 01 June 2022)                                                                                                                                                                                                              |
| (tw: (hpv) OR tw:(papilloma*)) AND (tw:(male*) OR tw:(men) OR tw:(man)) AND tw:(prevalence))<br>Restricted to papers published post 01/01/1995                                                                                                                 |
| PubMed (last searched 01 June, 2022)                                                                                                                                                                                                                           |
| ( HPV [MeSH] OR papillomaviridae [MeSH] OR papillomavirus [MeSH] ) AND (Male [MeSH] OR Men [MeSH] OR Males [MeSH] OR Man [MeSH] AND (name of country [Text])<br>• Name of country: eg.: Burkina Faso, Canada<br>Restricted to papers published post 01/01/1995 |

<sup>1</sup> Dunne EF, Nielson CM, Stone KM, Markowitz LE, Giuliano AR. Prevalence of HPV infection among men: A systematic review of the literature. *J Infect Dis* 2006; 194: 1044–57.

<sup>2</sup> Smith JS, Gilbert PA, Melendy A, Rana RK, Pimenta JM. Age-specific prevalence of human papillomavirus infection in males: a global review. *J Adolesc Health* 2011; 48: 540–52.

## Supplementary methods

Articles were included if they met the following eligibility criteria: reported HPV prevalence among men 15 years of age or older with no HPV-related pathology (e.g., studies in men with anogenital warts or penile cancer were excluded); used polymerase chain reaction (PCR) or Hybrid Capture 2 (HC2) techniques for HPV DNA detection; provided detailed methodological description of sampling techniques, transport medium, PCR HPV DNA assays and HPV genotyping techniques used; collected samples from penile and/or anal sites (e.g., glans, shaft, scrotum, urethra, anus, foreskin); had a sample size of at least 50 men; and the majority of samples were collected in 1995 or later. Studies conducted exclusively in men vaccinated against HPV, men who have sex with men (MSM), HIV positive men, partners of women with HPV-related pathology (e.g., anogenital pre-cancer or cancer), drug users, and sex workers were excluded, as well as studies that only included men who have been circumcised. We did include studies which sampled men presenting to sexually transmitted disease clinics who were asymptomatic.

## Appendix Table A2. Overview of study methods.

| Methods                                           | Description                                                                                                                                                                                                                                                                                                                                                                                                                                                                                                                                                                                                                                                                                                                                                                                                                                                                                                                                                                                                                                                                                                                                                                                                                                                                                                                                                                                                                                                                                                                                                                                                 |
|---------------------------------------------------|-------------------------------------------------------------------------------------------------------------------------------------------------------------------------------------------------------------------------------------------------------------------------------------------------------------------------------------------------------------------------------------------------------------------------------------------------------------------------------------------------------------------------------------------------------------------------------------------------------------------------------------------------------------------------------------------------------------------------------------------------------------------------------------------------------------------------------------------------------------------------------------------------------------------------------------------------------------------------------------------------------------------------------------------------------------------------------------------------------------------------------------------------------------------------------------------------------------------------------------------------------------------------------------------------------------------------------------------------------------------------------------------------------------------------------------------------------------------------------------------------------------------------------------------------------------------------------------------------------------|
| <b>Study selection &amp; Eligibility criteria</b> | <p><b>Inclusion criteria</b></p> <ul style="list-style-type: none"> <li>• Reported HPV prevalence among men 15 years of age or older with no HPV-related pathology.</li> <li>• Used either PCR or Hybrid Capture 2 techniques for HPV DNA detection.</li> <li>• Collected samples from penile and/or anal sites (e.g., glans, shaft, scrotum, urethra, anus, foreskin).</li> <li>• Provided detailed methodological description of sampling techniques, transport medium, PCR HPV DNA assays and HPV genotyping techniques used.</li> <li>• Sample size of at least 50 men.</li> <li>• Majority of samples were collected in 1995 or later.</li> <li>• Population-based surveys.</li> <li>• In non-population-based surveys: sample selection criteria not related to known risk factors of HPV infection or HPV related-diseases.</li> </ul> <p><b>Exclusion criteria</b></p> <ul style="list-style-type: none"> <li>• Studies conducted <b>exclusively</b> in the following populations to avoid either over or under estimation: <ul style="list-style-type: none"> <li>• Men with HPV related pathology (e.g., anogenital warts or penile cancer).</li> <li>• Men who have sex with men.</li> <li>• HIV positive men.</li> <li>• Partners of women with HPV-related pathology (e.g., anogenital pre-cancer or cancer).</li> <li>• Drug users.</li> <li>• Sex workers.</li> <li>• Men vaccinated against HPV.</li> <li>• Circumcised men.</li> </ul> </li> <li>• Studies with eligibility uncertainties and no clarification from the correspondent author was received after three attempts.</li> </ul> |

---

|                                        |                                                                                                                                                                                                                                                                                                                                                                                                                                                                                                                                                                                                                                                                                                                                                                                                                                                                                                                                                                                                                                                                                                                             |
|----------------------------------------|-----------------------------------------------------------------------------------------------------------------------------------------------------------------------------------------------------------------------------------------------------------------------------------------------------------------------------------------------------------------------------------------------------------------------------------------------------------------------------------------------------------------------------------------------------------------------------------------------------------------------------------------------------------------------------------------------------------------------------------------------------------------------------------------------------------------------------------------------------------------------------------------------------------------------------------------------------------------------------------------------------------------------------------------------------------------------------------------------------------------------------|
| <b>Data extraction &amp; synthesis</b> | <p><b>Data Extracted</b></p> <ul style="list-style-type: none"> <li>• First author, journal, year of publication, country, city, study period (first and last year), description of study population, prevalence of HIV</li> <li>• Type of study and enrolment methods, age (mean/ median/ range)</li> <li>• Anatomic site, sample collection methods,</li> <li>• HPV detection and genotyping methods (tests, probes, targeted HPV types)</li> <li>• Prevalence for any HPV and/or HR-HPV or low-risk HPV disaggregated by age. Only mucosal alpha-type HPV were included.</li> <li>• Type specific prevalence of HPV disaggregated by age</li> </ul><br><ul style="list-style-type: none"> <li>• Multi-country studies were broken down by country when possible.</li> <li>• If a study population was described in two or more publications we used the publication with the larger sample size and most detailed information and supplemented it with data from the other publications.</li> <li>• If the data from a study covered multiple years we used the start year of data collection in the analysis</li> </ul> |
| <b>Meta analyses</b>                   | <p>Random-effects models</p> <ul style="list-style-type: none"> <li>• Variables included in the univariable analysis: <ul style="list-style-type: none"> <li>○ Geography (Eastern and South-Eastern Asia, all other regions)</li> <li>○ Sample size (&gt;500, &lt;=500),</li> <li>○ Risk of bias (low, high),</li> <li>○ Studies conducted in STI clinics or equivalent</li> <li>○ Start year of data collection (before 2006, 2006-2013, 2014 or later),</li> <li>○ Method of sampling (self-collected, clinician collected),</li> <li>○ Anatomic sites sampled (at least the penile shaft and the glans penis/coronal sulcus sampled, did not collect data from both shaft and glans penis/ coronal sulcus),</li> <li>○ Number of HPV types tested in the HPV detection assay (8-15 types, 16-26 types, 27-50 types),</li> <li>○ Age (&lt;30 years, &gt;=30 years).</li> </ul> </li> <li>• If the year of data collection was missing we used the year of publication</li> </ul>                                                                                                                                          |
| <b>Metaregression</b>                  | <p>Random-effects meta-regression analyses.</p> <p>Factors associated with prevalence at <math>p \leq 0.20</math> in univariable analysis were eligible for inclusion in the multivariable analysis to estimate the magnitude of their effect.</p>                                                                                                                                                                                                                                                                                                                                                                                                                                                                                                                                                                                                                                                                                                                                                                                                                                                                          |

---

*HR: high-risk; HPV: human papillomavirus; PCR: polymerase chain reaction; STI: sexually transmitted infection*

**Appendix Table A3. Quality assessment checklist for prevalence studies (adapted from Hoy et al<sup>3</sup>, and Agbor et al<sup>4</sup>).**

| Risk of bias items                                                                                                                                    | Risk of bias levels                                                                                                                                                                                                                     | Points scored |
|-------------------------------------------------------------------------------------------------------------------------------------------------------|-----------------------------------------------------------------------------------------------------------------------------------------------------------------------------------------------------------------------------------------|---------------|
| 1. Was the study's target population a close representation of the national population in relation to relevant variables, e.g., age, sex, occupation? |                                                                                                                                                                                                                                         |               |
|                                                                                                                                                       | Yes (LOW RISK): The study's target population was a close representation of the national population                                                                                                                                     | 0             |
|                                                                                                                                                       | No (HIGH RISK): The study's target population was clearly NOT representative of the national population.                                                                                                                                | 1             |
| 2. Was the sampling frame a true or close representation of the target population?                                                                    |                                                                                                                                                                                                                                         |               |
|                                                                                                                                                       | Yes (LOW RISK): The sampling frame was a true or close representation of the target population.                                                                                                                                         | 0             |
|                                                                                                                                                       | No (HIGH RISK): The sampling frame was NOT a true or close representation of the target population.                                                                                                                                     | 1             |
| 3. Was some form of random selection used to select the sample, OR, was a census undertaken?                                                          |                                                                                                                                                                                                                                         |               |
|                                                                                                                                                       | Yes (LOW RISK): A census was undertaken, OR, some form of random selection was used to select the sample (e.g. simple random sampling, stratified random sampling, cluster sampling, systematic sampling)                               | 0             |
|                                                                                                                                                       | No (HIGH RISK): A census was NOT undertaken, AND some form of random selection was NOT used to select the sample                                                                                                                        | 1             |
| 4. Was the likelihood of non-response bias minimal?                                                                                                   |                                                                                                                                                                                                                                         |               |
|                                                                                                                                                       | Yes (LOW RISK): The response rate for the study was $\geq 75\%$ , OR, an analysis was performed that showed no significant difference in relevant demographic characteristics between responders and non-responders                     | 0             |
|                                                                                                                                                       | No (HIGH RISK): The response rate was $< 75\%$ , and if any analysis comparing responders and non-responders was done, it showed a significant difference in relevant demographic characteristics between responders and non-responders | 1             |

<sup>3</sup> Hoy D, Brooks P, Woolf A, Blyth F, March L, Bain C, et al. Assessing risk of bias in prevalence studies: modification of an existing tool and evidence of interrater agreement. *J Clin Epidemiol* 2012;65:934–9. <https://doi.org/10.1016/j.jclinepi.2011.11.014>.

<sup>4</sup> Agbor VN, Takah NF, Aminde LN. Prevalence and factors associated with medication adherence among patients with hypertension in sub-Saharan Africa: protocol for a systematic review and meta-analysis. *BMJ Open* 2018;8:e020715. <https://doi.org/10.1136/bmjopen-2017-020715>.

**Appendix Table A4. Countries, number of studies and men included per sub-analysis.**

| <b>Analysis</b>                    | <b>N studies</b> | <b>N men</b> |
|------------------------------------|------------------|--------------|
| HPV-16 prevalence                  | 54               | 41 482       |
| HPV-18 prevalence                  | 52               | 40 705       |
| HPV-31 prevalence                  | 52               | 40 694       |
| HPV-33 prevalence                  | 52               | 40 696       |
| HPV-35 prevalence                  | 50               | 40 156       |
| HPV-39 prevalence                  | 48               | 39 042       |
| HPV-45 prevalence                  | 50               | 40 223       |
| HPV-51 prevalence                  | 47               | 38 929       |
| HPV-52 prevalence                  | 48               | 39 494       |
| HPV-56 prevalence                  | 50               | 40 275       |
| HPV-58 prevalence                  | 51               | 40 391       |
| HPV-59 prevalence                  | 46               | 38 768       |
| HPV-6 prevalence                   | 53               | 41 045       |
| HPV-11 prevalence                  | 51               | 39 995       |
| Age-specific prevalence (Any type) | 47               | 39 183       |
| Age-specific prevalence (HR-HPV)   | 38               | 36 331       |
| Age-specific prevalence (HPV-16)   | 33               | 29 966       |

| <b>Region</b>                  | <b>Countries</b>                                                                                               |
|--------------------------------|----------------------------------------------------------------------------------------------------------------|
| Eastern and South-Eastern Asia | China, Japan, Malaysia, and South Korea                                                                        |
| Europe                         | Croatia, Denmark, Finland, Germany, Netherlands, Norway, Portugal, Russia, Slovenia, Spain, Sweden, and the UK |
| North America                  | Canada and the USA                                                                                             |
| Central and South America      | Brazil, Costa Rica, Mexico, and Peru                                                                           |
| Sub-Saharan Africa             | Botswana, Kenya, Mozambique, Rwanda, South Africa, and Uganda                                                  |

**Appendix Table A5. Meta-analyses of studies reporting prevalence of 2-valent, 4-valent and 9-valent HPV vaccines by United Nations Sustainable Development Goals regional or sub-regional grouping and World Bank income classification.**

|                                 | 2v (16, 18) |               |                           | 4v (6, 11, 16, 18) |               |                           | 9v (6, 11, 16, 18, 31, 33, 45, 52, 58) |               |                           |
|---------------------------------|-------------|---------------|---------------------------|--------------------|---------------|---------------------------|----------------------------------------|---------------|---------------------------|
|                                 | N Studies   | N Men         | HPV prevalence % (95% CI) | N Studies          | N Men         | HPV prevalence % (95% CI) | N Studies                              | N Men         | HPV prevalence % (95% CI) |
| <b>Global</b>                   | <b>53</b>   | <b>41,317</b> | <b>7% (6 - 8)</b>         | <b>52</b>          | <b>40,880</b> | <b>11% (9 - 13)</b>       | <b>52</b>                              | <b>41,007</b> | <b>16% (14 - 18)</b>      |
| <b>SDG Region*</b>              |             |               |                           |                    |               |                           |                                        |               |                           |
| Australia and New Zealand       | 1           | 511           | 4% (3 - 6)                | 1                  | 511           | 7% (5 - 10)               | 1                                      | 511           | 15% (12 - 18)             |
| Eastern and South-Eastern Asia  | 9           | 10,110        | 4% (2 - 6)                | 9                  | 10,110        | 7% (3 - 13)               | 9                                      | 10,110        | 11% (6 - 16)              |
| <i>Eastern Asia</i>             | 8           | 9,721         | 3% (2 - 6)                | 8                  | 9,721         | 7% (2 - 13)               | 8                                      | 9,721         | 10% (6 - 16)              |
| Europe and Northern America     | 26          | 13,412        | 8% (6 - 10)               | 25                 | 12,975        | 12% (10 - 15)             | 25                                     | 13,102        | 16% (13 - 20)             |
| <i>Europe</i>                   | 15          | 6,566         | 6% (5 - 8)                | 14                 | 6,129         | 10% (7 - 13)              | 15                                     | 6,566         | 15% (11 - 20)             |
| <i>Northern America</i>         | 12          | 6,846         | 10% (7 - 13)              | 12                 | 6,846         | 15% (11 - 19)             | 11                                     | 6,536         | 18% (14 - 23)             |
| Latin America and the Caribbean | 10          | 8,463         | 9% (5 - 12)               | 10                 | 8,463         | 15% (10 - 20)             | 10                                     | 8,463         | 20% (14 - 27)             |
| <i>Central America</i>          | 5           | 3,923         | 6% (3 - 11)               | 5                  | 3,923         | 9% (4 - 16)               | 5                                      | 3,923         | 13% (5 - 23)              |
| <i>South America</i>            | 5           | 3,239         | 14% (6 - 23)              | 5                  | 3,239         | 24% (15 - 34)             | 5                                      | 3,239         | 30% (21 - 40)             |
| Sub-Saharan Africa              | 10          | 8,558         | 6% (4 - 8)                | 10                 | 8,558         | 11% (9 - 14)              | 10                                     | 8,558         | 19% (15 - 24)             |
| <i>Eastern Africa</i>           | 6           | 5,551         | 6% (3 - 9)                | 6                  | 5,551         | 10% (7 - 14)              | 6                                      | 5,551         | 18% (12 - 26)             |
| <i>Southern Africa</i>          | 4           | 3,007         | 6% (4 - 9)                | 4                  | 3,007         | 13% (10 - 15)             | 4                                      | 3,007         | 20% (16 - 25)             |
| <b>Income level</b>             |             |               |                           |                    |               |                           |                                        |               |                           |
| High income                     | 29          | 14,229        | 8% (6 - 10)               | 28                 | 13,792        | 12% (10 - 15)             | 28                                     | 13,919        | 17% (14 - 21)             |
| Low and middle income           | 26          | 26,825        | 6% (5 - 7)                | 26                 | 26,825        | 10% (8 - 13)              | 26                                     | 26,825        | 16% (13 - 19)             |
| Upper middle income             | 20          | 21,274        | 6% (4 - 7)                | 20                 | 21,274        | 10% (8 - 13)              | 20                                     | 21,274        | 15% (12 - 19)             |
| Lower middle income             | 3           | 4,231         | 7% (3 - 14)               | 3                  | 4,231         | 12% (6 - 18)              | 3                                      | 4,231         | 20% (11 - 32)             |
| Low income                      | 3           | 1,320         | 5% (1 - 11)               | 3                  | 1,320         | 9% (3 - 17)               | 3                                      | 1,320         | 16% (4 - 33)              |

\* Estimates provided only for those regions with over 500 men sampled. SDG: Sustainable Development Goals; CI: confidence intervals; HPV: human papillomavirus; v: valent



**Appendix Table A6. Meta-analyses of studies, median and interquartile range (Q3-Q1) of HR-HPV prevalence by United Nations Sustainable Development Goals regional or sub-regional grouping.**

| <b>Geographical area</b>       | <b>% (95% CI)</b>    | <b>Median</b> | <b>IQR (Q3-Q1)</b>  |
|--------------------------------|----------------------|---------------|---------------------|
| <b>Global</b>                  | <b>21% (18 - 24)</b> | <b>20%</b>    | <b>17% (29-12%)</b> |
| Sub-Saharan Africa             | 25% (18 - 32)        | 26%           | 18% (35-17%)        |
| Central and South America      | 22% (16 - 29)        | 20%           | 15% (29-14%)        |
| Europe                         | 22% (17 - 28)        | 20%           | 17% (32-15%)        |
| Northern America               | 27% (21 - 32)        | 24%           | 9% (29-20%)         |
| Eastern and South-Eastern Asia | 10% (7 - 13)         | 10%           | 7% (13-6%)          |

Q1 is the 25th percentile, meaning that 25% of the data falls below the first quartile; Q3 is the 75th percentile, meaning that 75% of the data falls below the third quartile; CI: confidence intervals;

**Appendix Table A7. Prevalence of genital HPV infection in men: any HPV, HR-HPV, HPV-16 and HPV-6 by selected variables.**

|                                                                      | Any HPV type |        |                              |                      | HR-HPV |        |                              |                      | HPV-16 |        |                              |                      | HPV-6 |        |                              |                      |
|----------------------------------------------------------------------|--------------|--------|------------------------------|----------------------|--------|--------|------------------------------|----------------------|--------|--------|------------------------------|----------------------|-------|--------|------------------------------|----------------------|
|                                                                      | N            | N Men  | HPV prevalence<br>% (95% CI) | p-value <sup>1</sup> | N      | N Men  | HPV prevalence<br>% (95% CI) | p-value <sup>1</sup> | N      | N Men  | HPV prevalence<br>% (95% CI) | p-value <sup>1</sup> | N     | N Men  | HPV prevalence<br>% (95% CI) | p-value <sup>1</sup> |
| <b>Global</b>                                                        | 65           | 44,769 | 31% (27 - 35)                |                      | 56     | 41,617 | 21% (18 - 24)                |                      | 54     | 41,482 | 5% (4 - 7)                   |                      | 53    | 41,045 | 4% (3 - 5)                   |                      |
| <b>Geography</b>                                                     |              |        |                              |                      |        |        |                              |                      |        |        |                              |                      |       |        |                              |                      |
| Eastern and South-Eastern Asia                                       | 11           | 10,335 | 15% (11 - 21)                |                      | 10     | 10,030 | 10% (7 - 13)                 |                      | 9      | 10,110 | 2% (1 - 5)                   |                      | 9     | 10,110 | 3% (0 - 10)                  |                      |
| All other regions                                                    | 54           | 34,434 | 34% (30 - 38)                |                      | 46     | 31,587 | 23% (20 - 26)                |                      | 45     | 31,372 | 6% (5 - 7)                   |                      | 44    | 30,935 | 4% (3 - 5)                   |                      |
|                                                                      |              |        | <b>p &lt; 0-0001</b>         |                      |        |        | <b>p &lt; 0-0001</b>         |                      |        |        | <b>p = 0-005</b>             |                      |       |        | <b>p = 0-733</b>             |                      |
| <b>Sample size</b>                                                   |              |        |                              |                      |        |        |                              |                      |        |        |                              |                      |       |        |                              |                      |
| >500                                                                 | 24           | 34,423 | 32% (26 - 38)                |                      | 21     | 32,710 | 21% (17 - 26)                |                      | 22     | 32,744 | 5% (4 - 6)                   |                      | 22    | 32,743 | 4% (2 - 6)                   |                      |
| <=500                                                                | 42           | 10,346 | 30% (25 - 36)                |                      | 36     | 8,907  | 20% (16 - 24)                |                      | 33     | 8,738  | 6% (4 - 9)                   |                      | 32    | 8,302  | 4% (3 - 5)                   |                      |
|                                                                      |              |        | p = 0-651                    |                      |        |        | p = 0-754                    |                      |        |        | p = 0-105                    |                      |       |        | p = 0-939                    |                      |
| <b>Risk of bias</b>                                                  |              |        |                              |                      |        |        |                              |                      |        |        |                              |                      |       |        |                              |                      |
| Low                                                                  | 35           | 29,781 | 30% (25 - 36)                |                      | 32     | 29,066 | 21% (17 - 25)                |                      | 28     | 28,780 | 5% (4 - 7)                   |                      | 28    | 28,780 | 3% (2 - 4)                   |                      |
| High                                                                 | 30           | 14,988 | 32% (27 - 37)                |                      | 24     | 12,551 | 20% (17 - 25)                |                      | 26     | 12,702 | 6% (4 - 8)                   |                      | 25    | 12,265 | 5% (2 - 8)                   |                      |
|                                                                      |              |        | p = 0-765                    |                      |        |        | p = 0-858                    |                      |        |        | p = 0-785                    |                      |       |        | p = 0-300                    |                      |
| <b>Studies conducted in STD clinics or equivalent</b>                |              |        |                              |                      |        |        |                              |                      |        |        |                              |                      |       |        |                              |                      |
| No                                                                   | 47           | 36,841 | 30% (26 - 34)                |                      | 43     | 36,016 | 20% (17 - 23)                |                      | 39     | 35,562 | 5% (4 - 6)                   |                      | 39    | 35,562 | 3% (2 - 5)                   |                      |
| Yes                                                                  | 18           | 7,928  | 34% (26 - 42)                |                      | 13     | 5,601  | 24% (17 - 32)                |                      | 15     | 5,920  | 7% (4 - 10)                  |                      | 14    | 5,483  | 6% (3 - 9)                   |                      |
|                                                                      |              |        | p = 0-430                    |                      |        |        | p = 0-271                    |                      |        |        | p = 0-211                    |                      |       |        | p = 0-080                    |                      |
| <b>Start year of data collection<sup>2</sup></b>                     |              |        |                              |                      |        |        |                              |                      |        |        |                              |                      |       |        |                              |                      |
| Before 2006                                                          | 30           | 21,586 | 28% (22 - 34)                |                      | 25     | 20,001 | 19% (15 - 23)                |                      | 22     | 19,504 | 5% (4 - 6)                   |                      | 21    | 19,067 | 3% (2 - 5)                   |                      |
| 2006-2013                                                            | 25           | 14,418 | 34% (28 - 40)                |                      | 21     | 12,851 | 22% (17 - 28)                |                      | 22     | 13,213 | 6% (4 - 8)                   |                      | 22    | 13,213 | 4% (2 - 5)                   |                      |
| 2014 or later                                                        | 7            | 8,449  | 28% (18 - 39)                |                      | 7      | 8,449  | 18% (13 - 24)                |                      | 7      | 8,449  | 4% (1 - 7)                   |                      | 7     | 8,449  | 6% (1 - 14)                  |                      |
|                                                                      |              |        | p = 0-338                    |                      |        |        | p = 0-545                    |                      |        |        | p = 0-263                    |                      |       |        | p = 0-628                    |                      |
| <b>Method of sampling<sup>3</sup></b>                                |              |        |                              |                      |        |        |                              |                      |        |        |                              |                      |       |        |                              |                      |
| Self-collected                                                       | 13           | 5,869  | 35% (27 - 43)                |                      | 13     | 5,869  | 22% (17 - 27)                |                      | 11     | 5,644  | 7% (5 - 9)                   |                      | 11    | 5,644  | 4% (2 - 6)                   |                      |
| Clinician collected                                                  | 50           | 38,250 | 30% (26 - 34)                |                      | 41     | 35,098 | 20% (17 - 23)                |                      | 41     | 35,188 | 5% (4 - 6)                   |                      | 40    | 34,751 | 4% (2 - 5)                   |                      |
|                                                                      |              |        | p = 0-257                    |                      |        |        | p = 0-504                    |                      |        |        | p = 0-155                    |                      |       |        | p = 0-750                    |                      |
| <b>Anatomic sites sampled</b>                                        |              |        |                              |                      |        |        |                              |                      |        |        |                              |                      |       |        |                              |                      |
| At least the penile shaft and the glans penis/coronal sulcus sampled | 32           | 30,959 | 37% (31 - 42)                |                      | 30     | 30,331 | 23% (20 - 28)                |                      | 30     | 30,580 | 7% (5 - 8)                   |                      | 30    | 30,580 | 4% (3 - 6)                   |                      |
| Did not collect data from both shaft and glans penis/ coronal sulcus | 33           | 13,810 | 24% (20 - 30)                |                      | 26     | 11,286 | 17% (14 - 21)                |                      | 24     | 10,902 | 4% (3 - 5)                   |                      | 23    | 10,465 | 4% (2 - 5)                   |                      |
|                                                                      |              |        | <b>p = 0-001</b>             |                      |        |        | <b>p = 0-024</b>             |                      |        |        | <b>p = 0-015</b>             |                      |       |        | <b>p = 0-632</b>             |                      |
| <b>Number of HPV types tested for</b>                                |              |        |                              |                      |        |        |                              |                      |        |        |                              |                      |       |        |                              |                      |
| 8 - 15 types                                                         | 10           | 5,854  | 20% (15 - 25)                |                      | 5      | 4,263  | 20% (14 - 26)                |                      | 6      | 5,113  | 3% (2 - 4)                   |                      | 5     | 4,676  | 3% (2 - 5)                   |                      |
| 16 - 26 types                                                        | 17           | 8,983  | 25% (18 - 33)                |                      | 16     | 8,386  | 17% (12 - 23)                |                      | 12     | 8,005  | 4% (2 - 6)                   |                      | 12    | 8,005  | 4% (2 - 7)                   |                      |

|               |                      |        |     |           |           |        |     |           |                      |        |    |         |           |        |    |         |
|---------------|----------------------|--------|-----|-----------|-----------|--------|-----|-----------|----------------------|--------|----|---------|-----------|--------|----|---------|
| 27 - 50 types | 38                   | 29,932 | 38% | (33 - 43) | 35        | 28,968 | 22% | (19 - 26) | 36                   | 28,364 | 7% | (5 - 8) | 36        | 28,364 | 4% | (3 - 6) |
|               | <b>p &lt; 0.0001</b> |        |     |           | p = 0.361 |        |     |           | <b>p &lt; 0.0001</b> |        |    |         | p = 0.816 |        |    |         |
| <b>Age</b>    |                      |        |     |           |           |        |     |           |                      |        |    |         |           |        |    |         |
| <30 years     | 47                   | 24,352 | 32% | (28 - 36) | 38        | 22,189 | 22% | (19 - 26) | 33                   | 19,614 | 5% | (4 - 6) | -         | -      | -  | -       |
| >=30 years    | 33                   | 14,831 | 34% | (28 - 41) | 29        | 14,142 | 21% | (17 - 25) | 22                   | 10,352 | 4% | (3 - 6) | -         | -      | -  | -       |
|               | p = 0.466            |        |     |           | p = 0.631 |        |     |           | p = 0.647            |        |    |         |           |        |    |         |

<sup>1</sup>. For heterogeneity between groups within the variable.

<sup>2</sup>. Three studies had no data on when the samples were collected. These were excluded from the analysis (Guzman 2008 (Chile); Kero 2011 (Finland) & Söderlund-Strand 2015 (Sweden))

<sup>3</sup>. Two studies had data for both self and clinician samples. These were excluded from the analysis (Ogilvie 2009 (Canada) & Khoo 2021 (Malaysia))

N=number of studies; CI: confidence intervals; HPV: human papillomavirus; HR: high-risk; STI: sexually transmitted infection;

**Appendix Figure A1. Meta-analysis of male genital HR-HPV prevalence by United Nations Sustainable Development Goals regional or sub-regional grouping.**

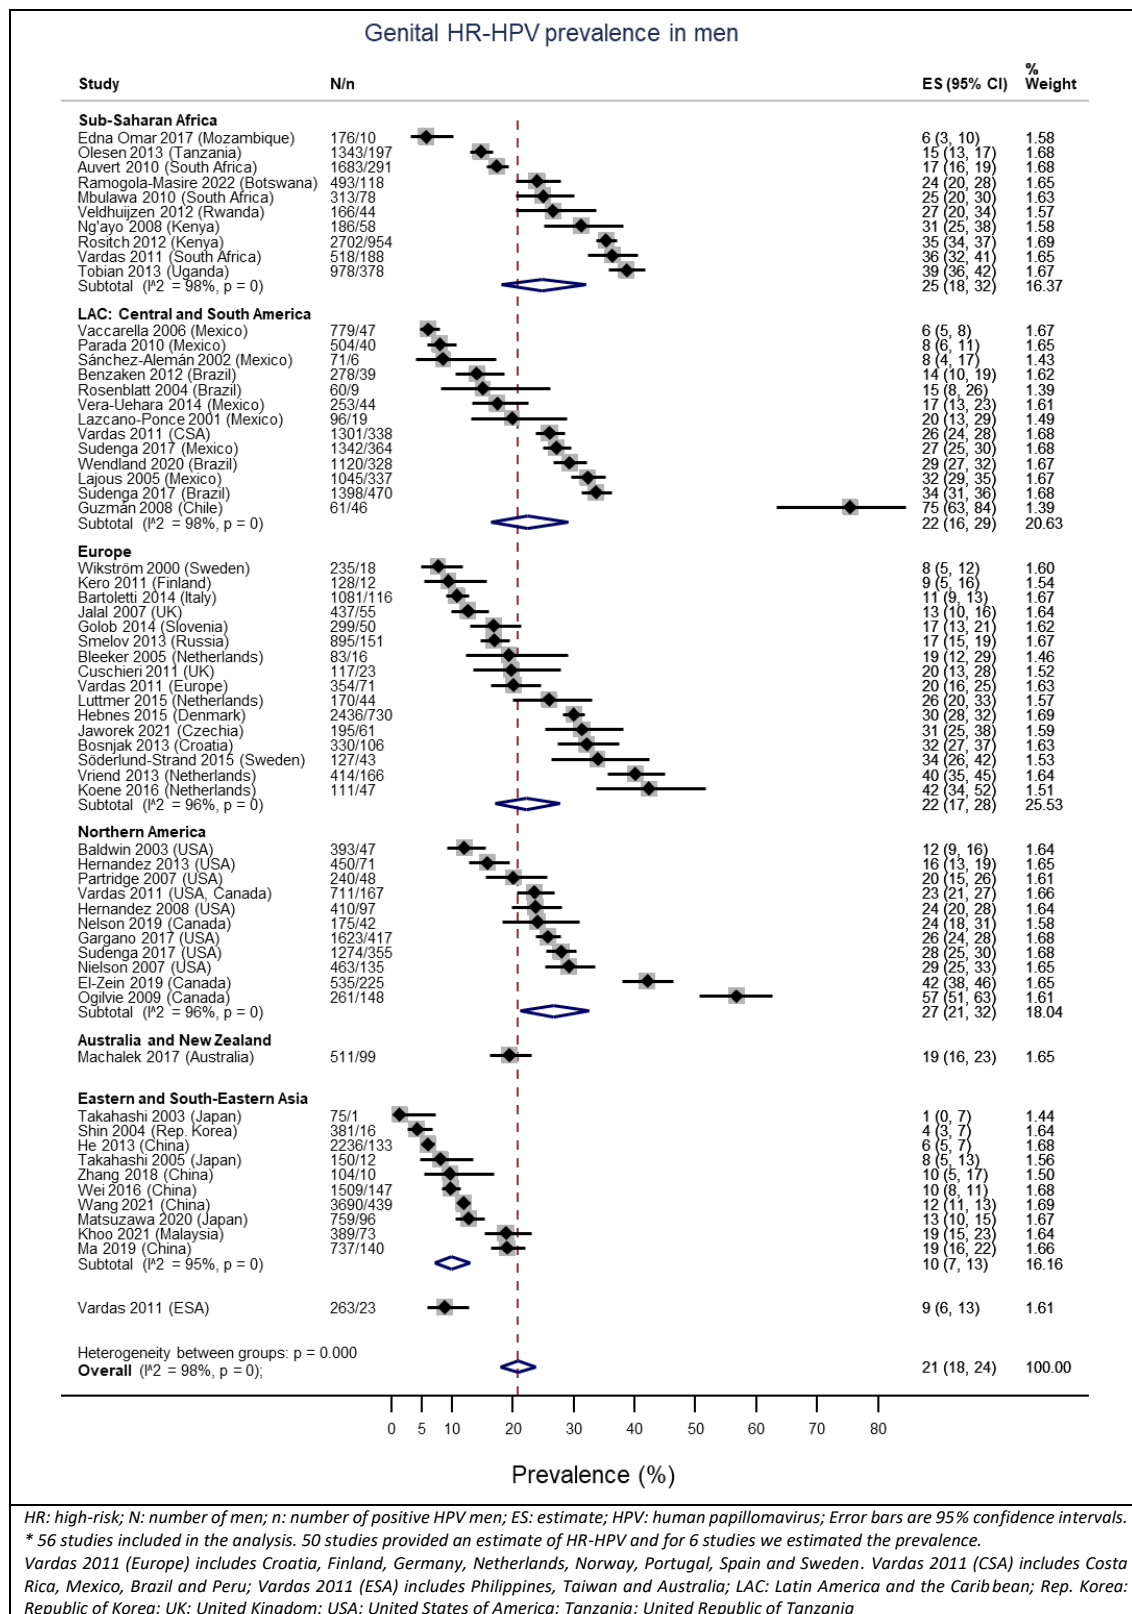

**Appendix Figure A2. Meta-analysis of male genital HPV prevalence (any HPV) by United Nations Sustainable Development Goals regional or sub-regional grouping.**

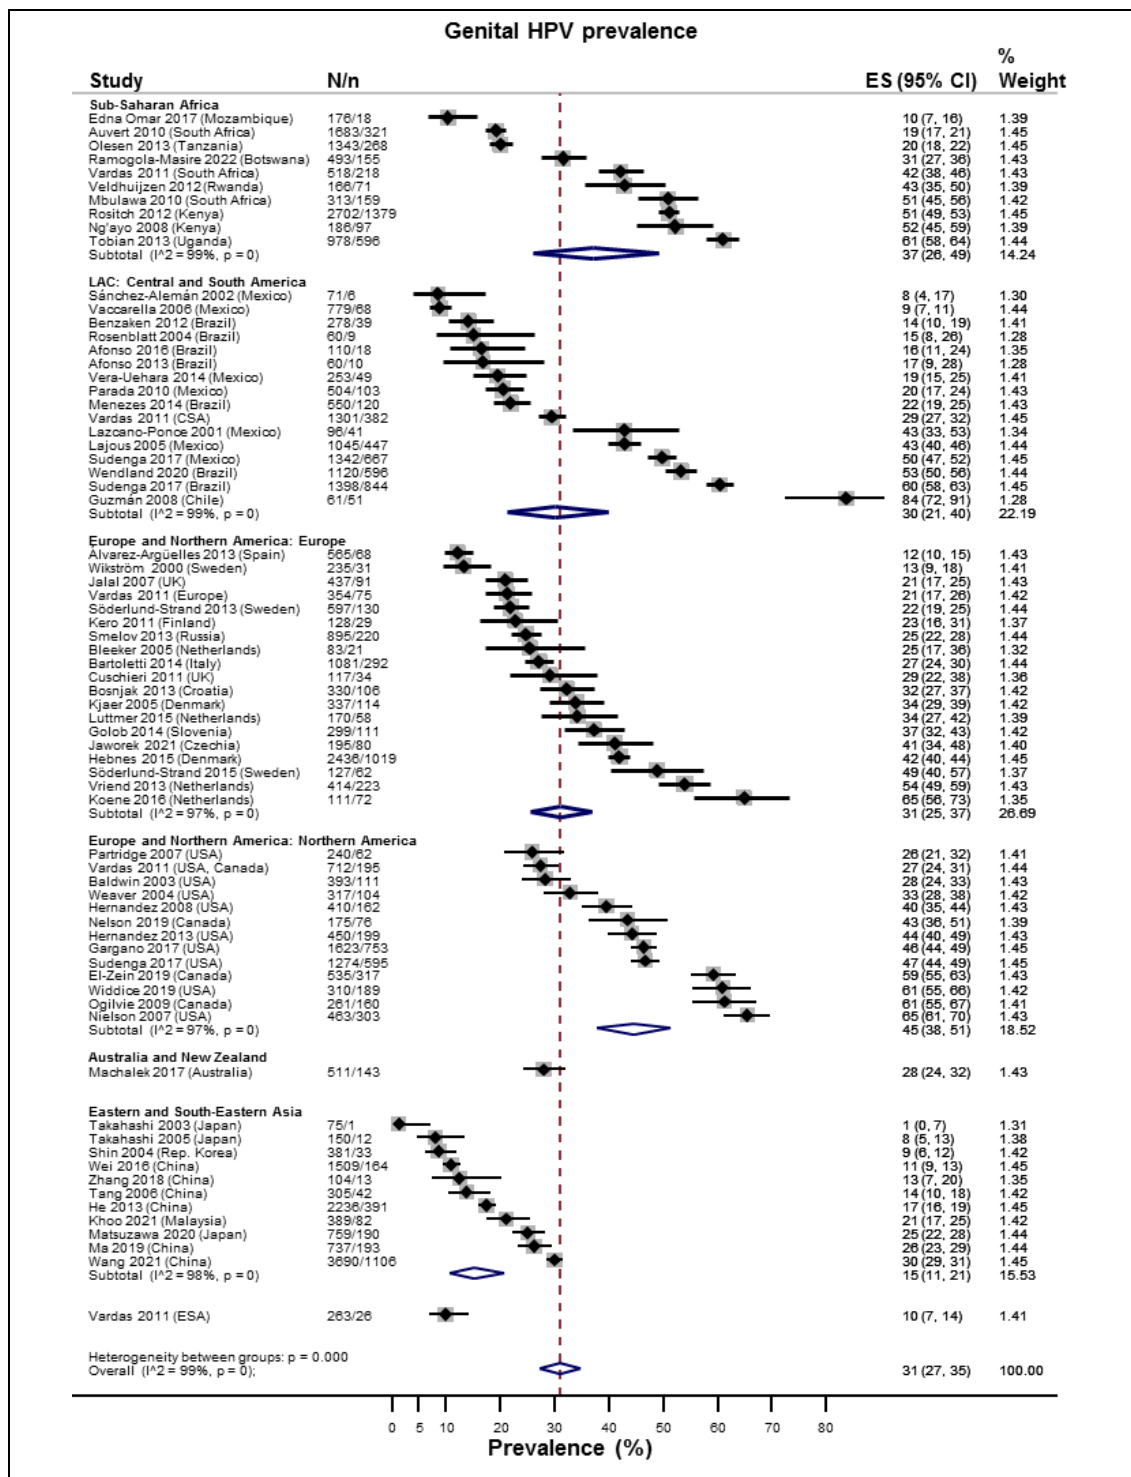

\* 62 studies provided an estimate of any HPV and for 3 studies we estimated the prevalence. Vardas 2011 (Europe) includes Croatia, Finland, Germany, Netherlands, Norway, Portugal, Spain, and Sweden. Vardas 2011 (CSA) includes Costa Rica, Mexico, Brazil, and Peru; Vardas 2011 (ESA) includes Philippines, Taiwan, and Australia; LAC: Latin America and the Caribbean; Rep. Korea: Republic of Korea; UK: United Kingdom; USA: United States of America; Tanzania: United Republic of Tanzania; Error bars are 95% confidence intervals.

**Appendix Figure A3. Meta-analysis of male genital HPV-16 prevalence by United Nations Sustainable Development Goals regional or sub-regional grouping.**

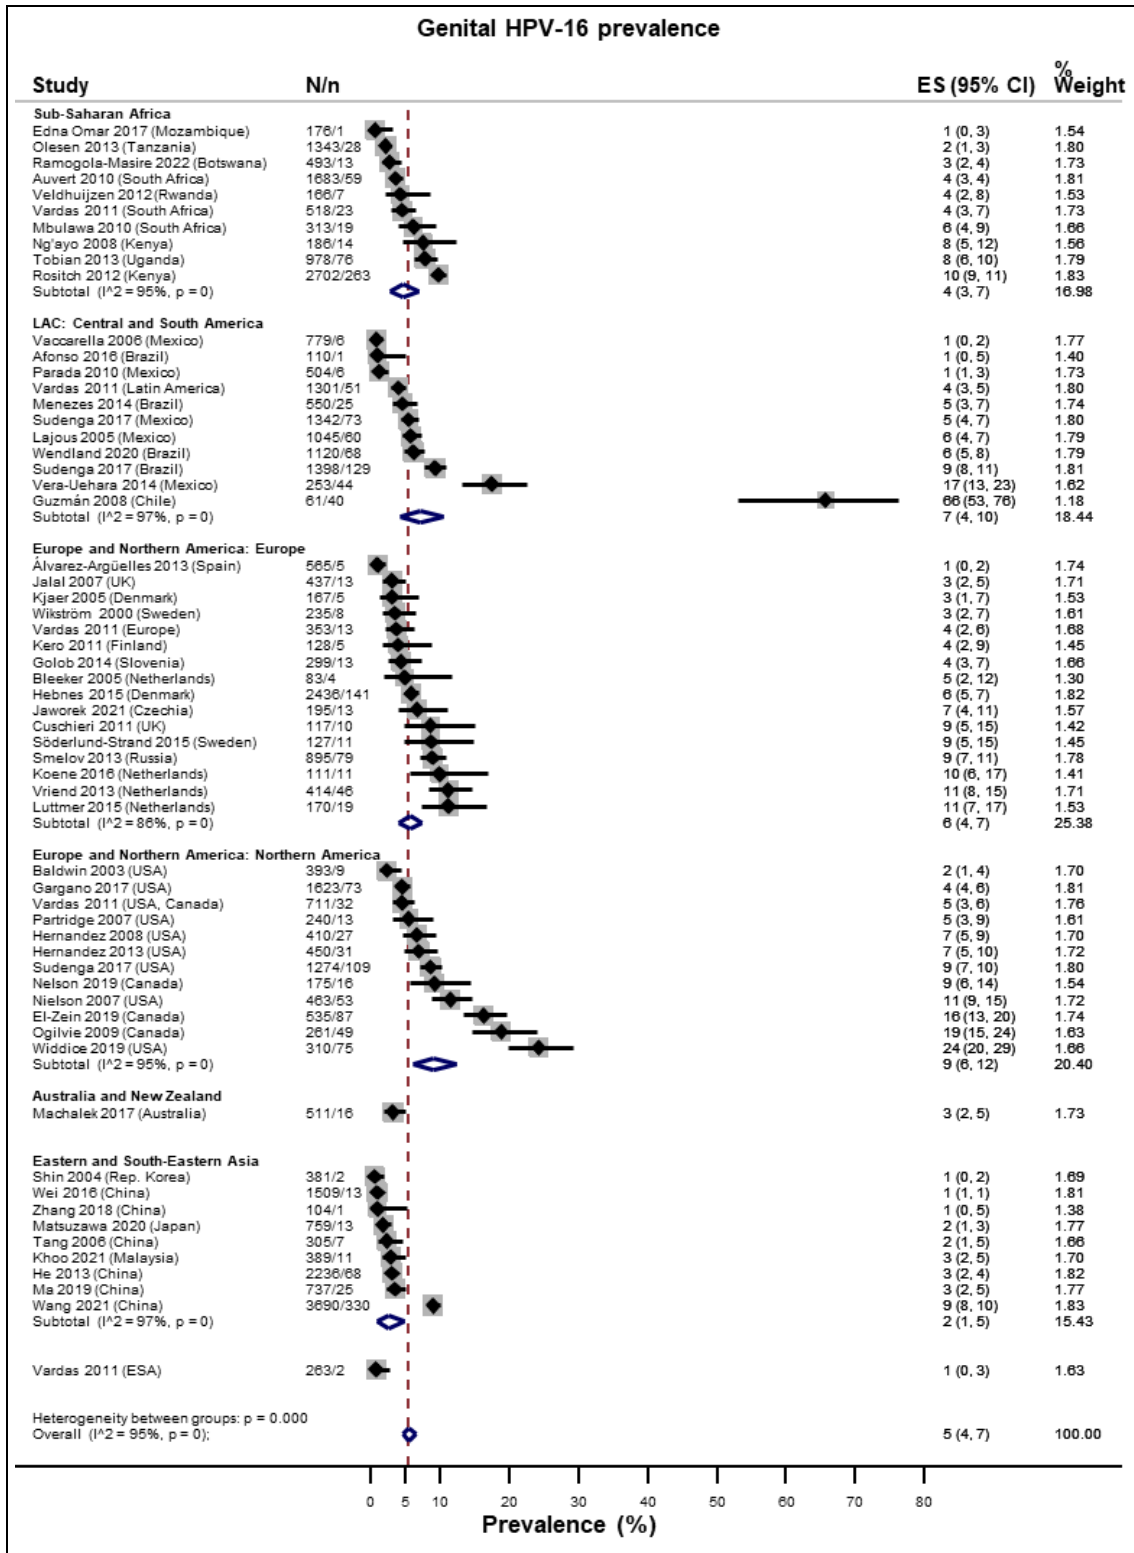

\* 54 studies included in the analysis. Vardas 2011 (Europe) includes Croatia, Finland, Germany, Netherlands, Norway, Portugal, Spain, and Sweden. Vardas 2011 (CSA) includes Costa Rica, Mexico, Brazil, and Peru; Vardas 2011 (ESA) includes Philippines, Taiwan, and Australia; LAC: Latin America and the Caribbean; Rep. Korea: Republic of Korea; UK: United Kingdom; USA: United States of America; Tanzania: United Republic of Tanzania; Error bars are 95% confidence intervals. Error bars are 95% confidence intervals.

**Appendix Figure A4. Meta-analysis of male genital HPV-6 prevalence by United Nations Sustainable Development Goals regional or sub-regional grouping.**

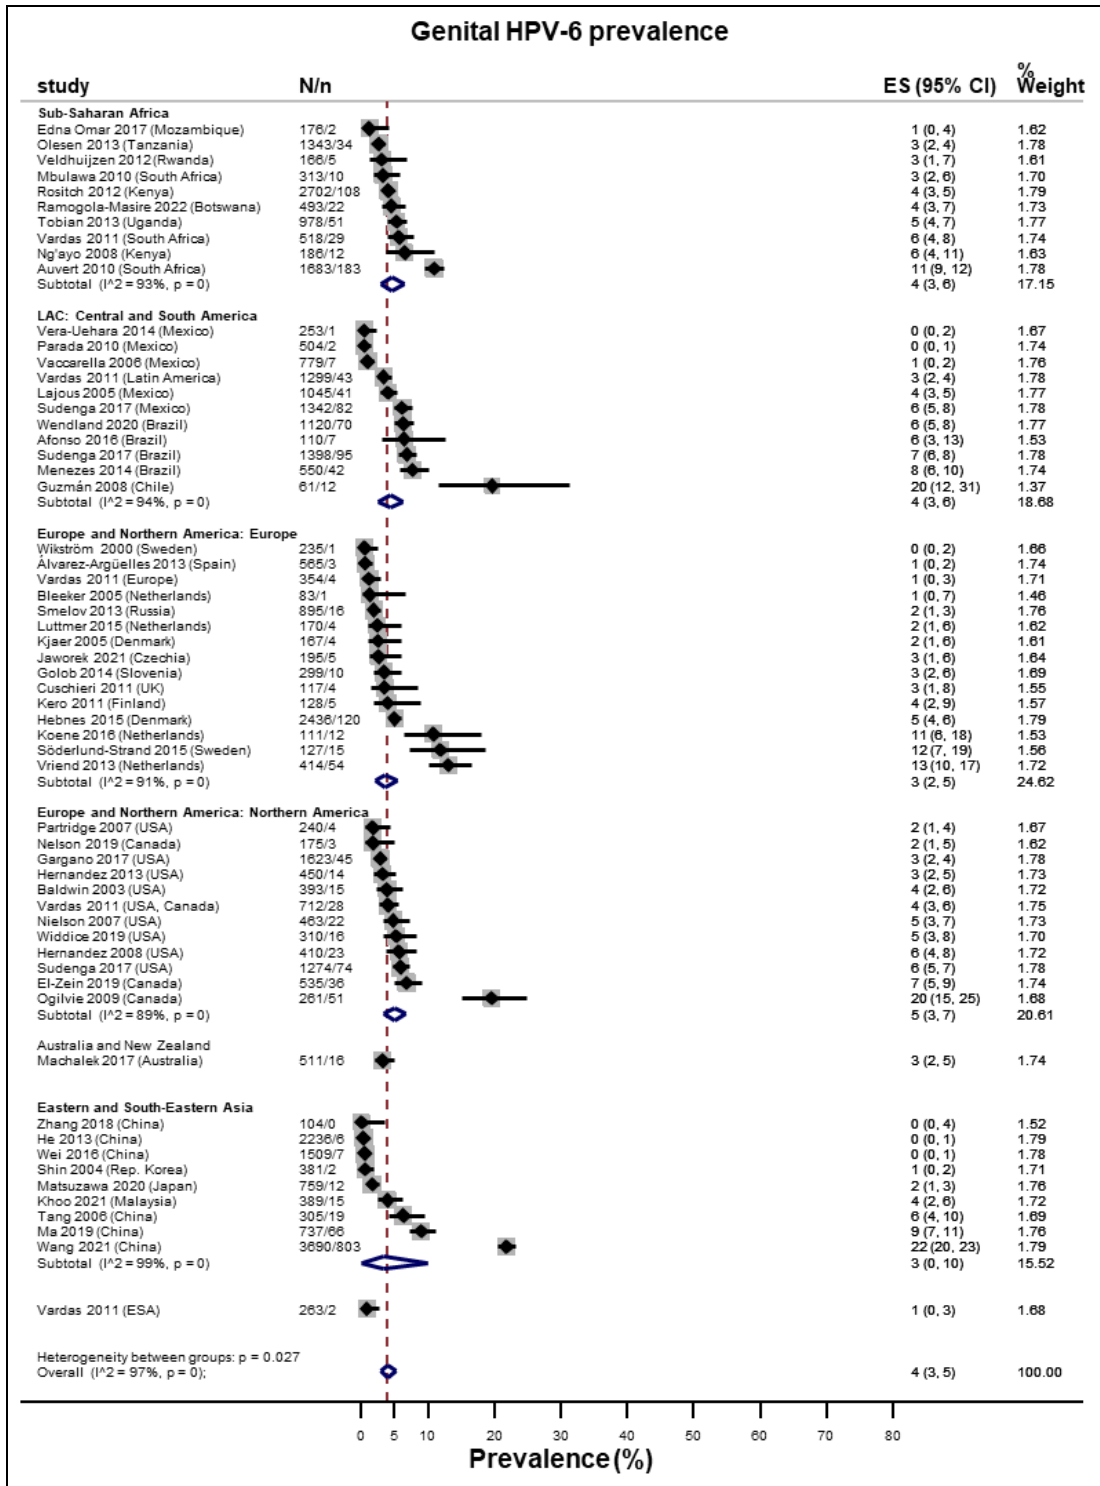

\* 53 studies included in the analysis. Vardas 2011 (Europe) includes Croatia, Finland, Germany, Netherlands, Norway, Portugal, Spain, and Sweden. Vardas 2011 (CSA) includes Costa Rica, Mexico, Brazil, and Peru; Vardas 2011 (ESA) includes Philippines, Taiwan, and Australia; LAC: Latin America and the Caribbean; Rep. Korea: Republic of Korea; UK: United Kingdom; USA: United States of America; Tanzania: United Republic of Tanzania; Error bars are 95% confidence intervals. Error bars are 95% confidence intervals.

**Appendix Figure A5. Age-specific prevalence of HR-HPV infection in men for the studies with data by age.**

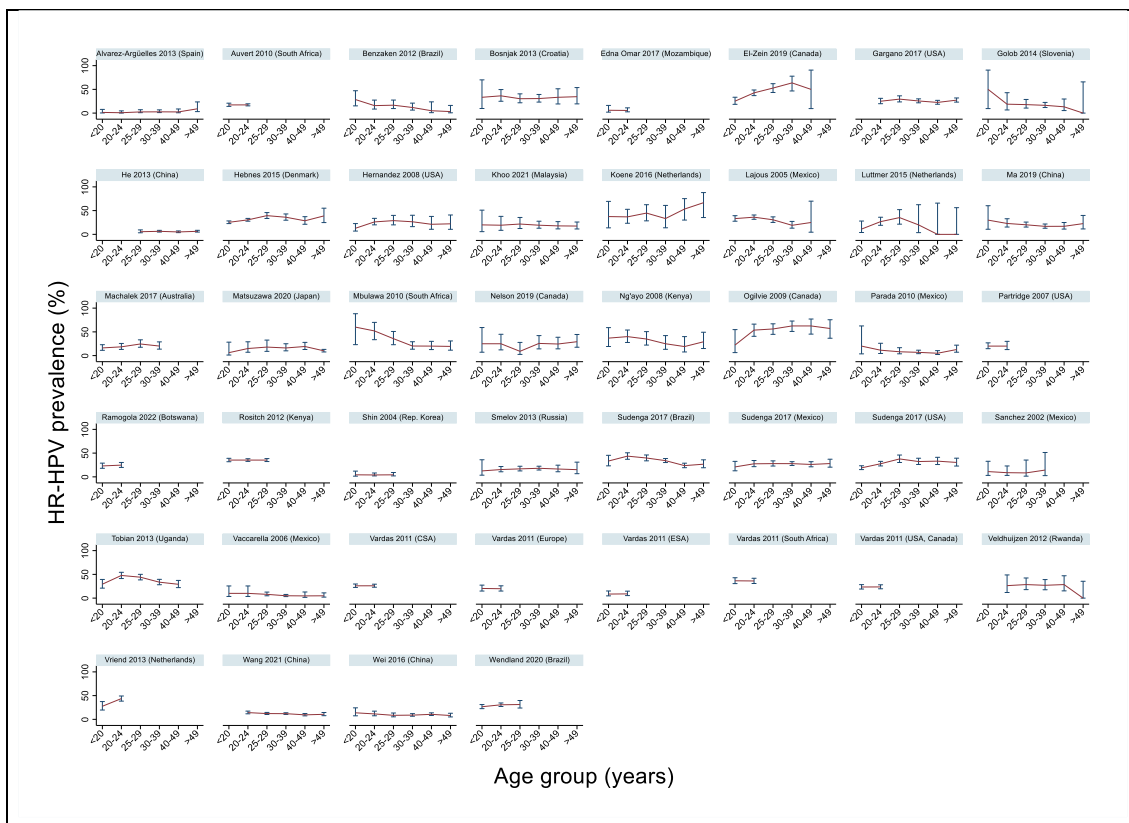

\* Vardas 2011 (CSA) includes Costa Rica, Mexico, Brazil, and Peru; Vardas 2011 (ESA) includes Philippines, Taiwan, and Australia. Vardas 2011 (Europe) includes Croatia, Finland, Germany, Netherlands, Norway, Portugal, Spain, and Sweden. Error bars are 95% confidence intervals. Graphs are presented in alphabetical order by first author. USA: United States of America; Error bars are 95% confidence intervals.



Appendix Figure A6. Funnel plot for HR-HPV prevalence by study.

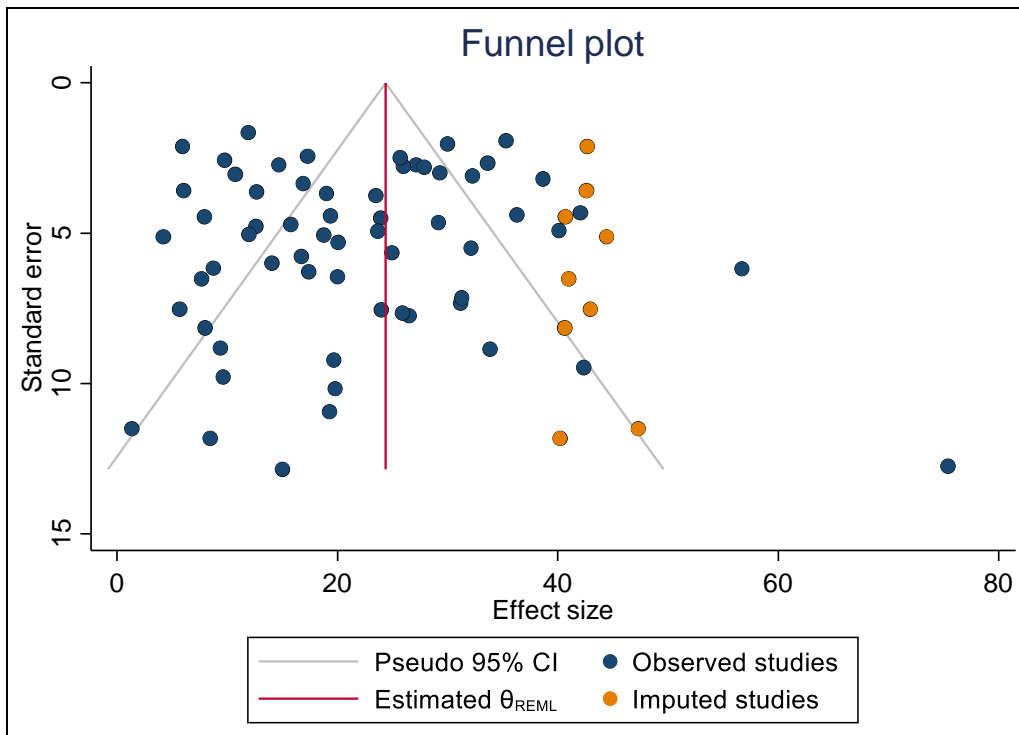

Supplement: mmc3.pdf [file mmc3.pdf]
