# Supplementary material for: Global and regional estimates of genital human papillomavirus prevalence among men: a systematic review and meta-analysis
Source: PubMed Central journal article supplement — Lancet Glob Health. 2023 Aug 15;11(9):e1345–62. doi: 10.1016/S2214-109X(23)00305-4 (PMC10447222; doi:10.1016/s2214-109x(23)00305-4), 2023-08-15
Supplement: mmc1.pdf [file mmc1.pdf]

# THE LANCET

## Global Health

### Supplementary appendix 1

This translation in Spanish was submitted by the authors and we reproduce it as supplied. It has not been peer reviewed. *The Lancet's* editorial processes have only been applied to the original in English, which should serve as reference for this manuscript.

Los autores nos proporcionaron esta traducción al español y la reproducimos tal como nos fue entregada. No la hemos revisado. Los procesos editoriales de The Lancet se han aplicado únicamente al original en inglés, que debe servir de referencia para este manuscrito.

Supplement to: Bruni L, Albero G, Rowley J, et al. Global and regional estimates of genital human papillomavirus prevalence among men: a systematic review and meta-analysis. *Lancet Glob Health* 2023; **11**: e1345–62.

## Resumen [ES]

### Antecedentes

Aunque la epidemiología del virus del papiloma humano (VPH) en mujeres está bien estudiada, la epidemiología del VPH en los hombres es menos conocida. Nuestro objetivo es proporcionar estimaciones actualizadas de la prevalencia de la infección genital por VPH en hombres por edad y tipo de VPH a nivel mundial y regional.

### Métodos

Se realizó una revisión sistemática y un metaanálisis para determinar la prevalencia de la infección genital por VPH en la población general masculina. Se realizaron búsquedas en Embase, Ovid MEDLINE y el Global Index Medicus para estudios publicados entre el 1 de enero de 1995 y el 1 de junio de 2022. Los criterios de inclusión consistieron en estudios poblacionales en hombres de 15 años o más o estudios de prevalencia del VPH con un tamaño de muestra de al menos 50 hombres sin patología relacionada con el VPH o factores de riesgo conocidos de infección por VPH, en que se recogieron muestras anogenitales y utilizaron técnicas de PCR o captura de híbridos 2 para la detección del ADN del VPH. Los criterios de exclusión consistieron en estudios realizados en poblaciones con mayor riesgo de infección por VPH, realizados exclusivamente en hombres circuncidados o que utilizaron muestras de orina o semen. Se revisaron los estudios identificados y se extrajeron datos agrupados de los que eran elegibles. Los datos fueron extraídos por dos investigadores de forma independiente, revisados por un tercero y las discrepancias se resolvieron por consenso. Sólo se extrajeron datos sobre los VPH  $\alpha$  de tropismo mucoso. Se estimaron prevalencias globales y regionales por edad para cualquier tipo de VPH, VPHs de alto riesgo (AR) y tipos individuales de VPH mediante metaanálisis de efectos aleatorios y se agruparon siguiendo la clasificación geográfica de los Objetivos de Desarrollo Sostenible de las Naciones Unidas.

### Hallazgos

Se identificaron 5685 publicaciones, de las cuales se incluyeron 65 estudios de 35 países sumando un total de 44769 hombres. La prevalencia global fue del 31% (IC del 95%: 27-35) para cualquier VPH y del 21% (18-24) para los VPHs-AR. El VPH-16 fue el genotipo de VPH más prevalente (5%, IC del 95%: 4-7), seguido del VPH-6 (4%, 3-5). Por edad, se observó una prevalencia del VPH elevada en adultos jóvenes, alcanzó el máximo entre los 25 y los 29 años, y se estabilizó o disminuyó ligeramente a partir de entonces. Las prevalencias de VPH fueron similares para Europa y América del Norte, África subsahariana, América Latina y el Caribe, y Australia y Nueva Zelanda. Sin embargo, la prevalencia para Asia oriental y sudoriental resultó ser la mitad que en las otras regiones.

### Interpretación

Casi uno de cada tres hombres en el mundo está infectado con al menos un tipo de VPH genital y alrededor de uno de cada cinco hombres está infectado con uno o más tipos de VPH-AR. Nuestros resultados muestran que la prevalencia del VPH es alta en los hombres mayores de 15 años y también indican que los hombres sexualmente activos, independientemente de su edad, son un importante reservorio de la infección genital por VPH. Estas estimaciones ponen de relieve la importancia de incorporar a los hombres en las estrategias globales de prevención

del VPH tanto para reducir la morbilidad y mortalidad relacionadas con el VPH en los hombres como, a su vez, lograr la eliminación del cáncer de cuello uterino.
