# Supplementary material for: Global and regional estimates of genital human papillomavirus prevalence among men: a systematic review and meta-analysis
Source: PubMed Central journal article supplement — Lancet Glob Health. 2023 Aug 15;11(9):e1345–62. doi: 10.1016/S2214-109X(23)00305-4 (PMC10447222; doi:10.1016/s2214-109x(23)00305-4), 2023-08-15
Supplement: mmc2.pdf [file mmc2.pdf]

# THE LANCET

## Global Health

### Supplementary appendix 2

This translation in French was submitted by the authors and we reproduce it as supplied. It has not been peer reviewed. *The Lancet's* editorial processes have only been applied to the original in English, which should serve as reference for this manuscript.

Cette traduction en français a été proposée par les auteurs et nous l'avons reproduite telle quelle. Elle n'a pas été examinée par des pairs. Les processus éditoriaux du Lancet n'ont été appliqués qu'à l'original en anglais et c'est cette version qui doit servir de référence pour ce manuscrit.

Supplement to: Bruni L, Albero G, Rowley J, et al. Global and regional estimates of genital human papillomavirus prevalence among men: a systematic review and meta-analysis. *Lancet Glob Health* 2023; **11**: e1345–62.

## Résumé [FR].

### Contexte

Alors que l'épidémiologie du virus du papillome humain (VPH) chez les femmes est bien documentée, l'épidémiologie du VPH chez les hommes est moins bien connue. Notre objectif est de fournir des estimations actualisées de la prévalence de l'infection génitale à VPH chez les hommes, par âge et par type de VPH, au niveau mondial et régional.

### Méthodes utilisées

Nous avons réalisé une revue systématique et une méta-analyse pour déterminer la prévalence de l'infection génitale à VPH dans la population masculine générale. Nous avons recherché dans Embase, Ovid MEDLINE et Global Index Medicus les publications parues entre le 1er janvier 1995 et le 1er juin 2022. Les critères d'inclusion comprenaient des études basées sur la population d'hommes âgés de 15 ans ou plus, ou des études de prévalence du VPH avec un échantillon d'au moins 50 hommes sans pathologie liée au VPH ni facteurs de risque connus pour l'infection par le VPH, et dans lesquelles des échantillons anogénitaux avaient été prélevés et les techniques de PCR ou de capture hybride 2 utilisées pour la détection de l'ADN du VPH. Les critères d'exclusion comprenaient les études menées dans des populations présentant un risque accru d'infection par le VPH, menées exclusivement chez des hommes circoncis et basées sur des échantillons d'urine ou de sperme. Les études identifiées ont été revues et les données regroupées ont été extraites de celles qui étaient éligibles. Ces données ont été extraites par deux chercheurs indépendants, révisées par un troisième ; les divergences ont été résolues par consensus. Les données n'ont été extraites que pour les VPH génitaux de genre alpha. Les prévalences mondiales et régionales par âge ont été estimées pour tous les types de VPH, les VPH à haut risque (HR) et chaque type de VPH était estimé par des modèles à effets aléatoires utilisés en méta-analyse puis regroupés selon la classification géographique des objectifs de développement durable des Nations unies.

### Résultats

Nous avons identifié 5685 publications. Soixante-cinq études ont été retenues provenant de 35 pays et incluant 44769 hommes. La prévalence globale était de 31 % (IC à 95 % 27-35) pour tous les VPH et de 21 % (18-24) pour les HR-VPH. Le génotype VPH-16 était le plus fréquent (5%, 95% CI 4-7), suivi par VPH-6 (4%, 3-5). Par âge, la prévalence des VPH était très élevée parmi les jeunes adultes, atteignant un pic entre 25 et 29 ans et se stabilisant ou diminuant légèrement par la suite. La prévalence des VPH était similaire en Europe, en Amérique du Nord, en Afrique subsaharienne, en Amérique latine et dans les Caraïbes, ainsi qu'en Australie et en Nouvelle-Zélande. La prévalence estimée pour l'Asie de l'Est et du Sud-Est était divisée par deux par rapport aux autres régions.

### Interprétation

Presque un homme sur trois est infecté par au moins un type de VPH génital et un homme sur cinq est infecté par un ou plusieurs types de HR-VPH. Nos résultats montrent que la prévalence du VPH est élevée parmi les hommes de plus de 15 ans et indiquent que les hommes sexuellement actifs, quel que soit leur âge, constituent un réservoir important d'infections génitales par le VPH. Ces estimations soulignent l'importance d'intégrer les hommes dans des stratégies globales de prévention du VPH, pour réduire la morbidité et la mortalité liées au VPH.

chez les hommes et sa transmission, et ainsi contribuer à l'élimination du cancer du col de l'utérus.
